# Supplementary material for: Discriminating radiation injury from recurrent tumor with [18F]PARPi and amino acid PET in mouse models
Source: Springer Nature journal article supplement (doi:10.1186/s13550-018-0399-z), 2018-07-04
Supplement: MOESM1 [file 15908340]

**Discriminating Radiation Necrosis from Recurrent Tumor with  
[<sup>18</sup>F]PARPi and Amino Acid PET in Mouse Models**

**Supporting Information**

Patrick L. Donabedian<sup>1</sup>, Susanne Kossatz<sup>1</sup>, John A. Engelbach<sup>2</sup>, Stephen A. Jannetti<sup>1,4,5</sup>,  
Brandon Carney<sup>1,4,6</sup>, Robert J. Young<sup>1,8</sup>, Wolfgang Weber<sup>1,7</sup>, Joel R. Garbow<sup>2,3</sup>, Thomas  
Reiner<sup>1,8</sup>

<sup>1</sup> Department of Radiology, Memorial Sloan-Kettering Cancer Center, New York, New York, United States of America

<sup>2</sup> Department of Radiology, Washington University, St. Louis, Missouri, United States of America

<sup>3</sup> Alvin J. Siteman Cancer Center, Washington University, St. Louis, Missouri, United States of America

<sup>4</sup> Department of Chemistry, Hunter College of the City University of New York, New York, New York, United States of America

<sup>5</sup> Ph.D Program in Biochemistry, Graduate Center of the City University of New York, New York, New York, United States of America

<sup>6</sup> Ph.D Program in Chemistry, Graduate Center of the City University of New York, New York, New York, United States of America

<sup>7</sup> Molecular Pharmacology and Chemistry Program, Memorial Sloan-Kettering Cancer Center, New York, New York, United States of America

<sup>8</sup> Department of Radiology, Weill Cornell Medical College, New York, New York, United States of America

**\*Corresponding author:**

Thomas Reiner, Ph.D.  
Department of Radiology, MSK  
1275 York Avenue  
New York, NY 10065  
Phone: 646-888-3461  
Fax: 646-422-0408  
Email: reinert@mskcc.org



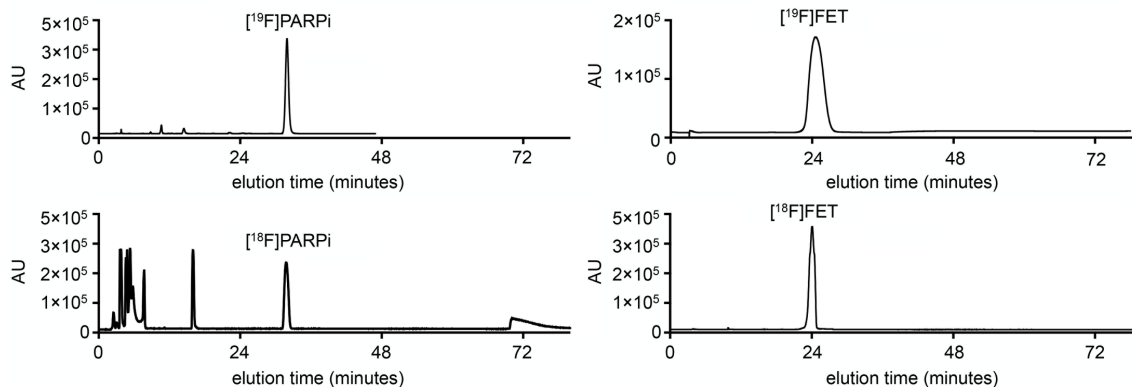

**Fig. S3** Verification of cold standard coelution with radiopharmaceutical. Cold standard HPLC chromatogram (UV280, top) and purification HPLC chromatogram (radio-HPLC, bottom) for [ $^{18}\text{F}$ ]PARPi (left) and [ $^{18}\text{F}$ ]FET (right).<sup>24</sup>

**Table S1** short tandem repeat fingerprinting results.

| % Match    | Cell No.     | Cell name           | Locus names |         |        |         |       |         |     |      |        |
|------------|--------------|---------------------|-------------|---------|--------|---------|-------|---------|-----|------|--------|
|            |              |                     | D5S818      | D13S317 | D7S820 | D16S539 | VWA   | TH01    | AM  | TPOX | CSF1PO |
|            |              | U251                | 11          | 10,11   | 10,12  | 12      | 16,18 | 9.3     | X   | 8    | 12,13  |
| <b>94%</b> | IFO5028<br>5 | U-251<br>MG<br>(KO) | 11,11       | 10,11   | 10,12  | 12,12   | 16,18 | 9.3,9.3 | X,X | 8,8  | 11,12  |

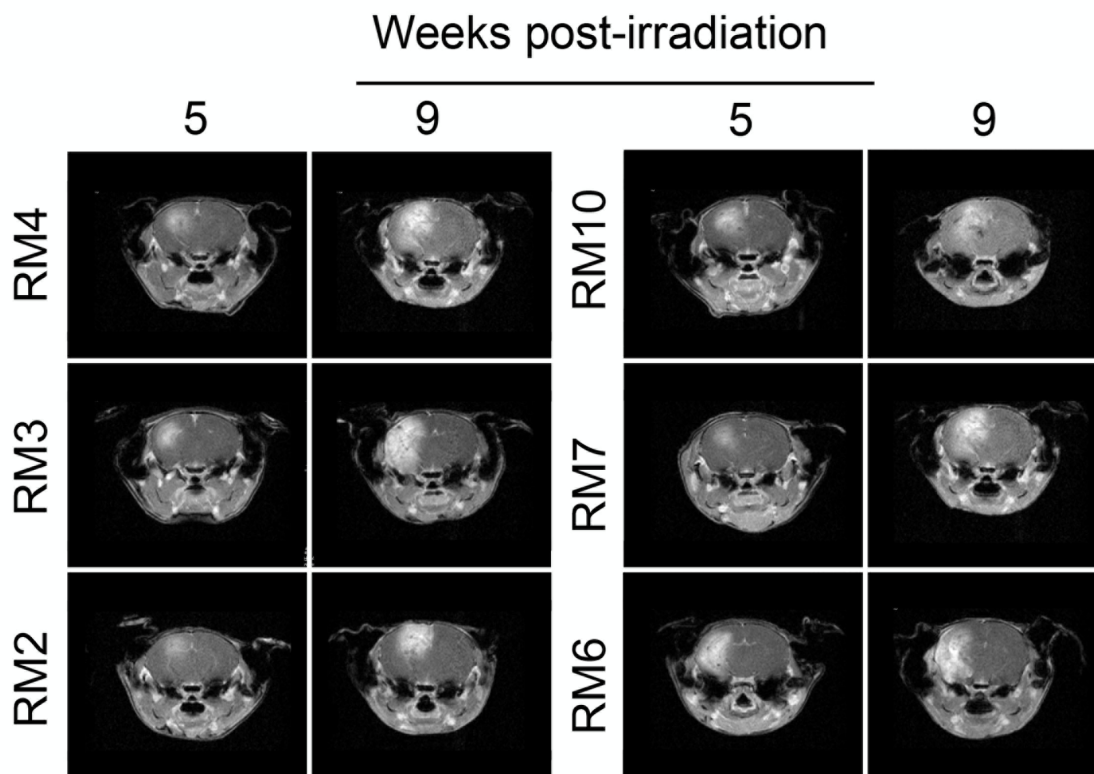

**Fig. S4** Course of experimental radiation necrosis lesions by DCE-MR.

**Table S2.** Complete data on PET VOIs for mice with experimental radiation necrosis injected with [<sup>18</sup>F]FET.

| Subject | Region   | %ID/cc <sub>mean</sub> | %ID/cc <sub>SD</sub> | %ID/cc <sub>min</sub> | %ID/cc <sub>max</sub> | max/max | mean/mean | max/mean |
|---------|----------|------------------------|----------------------|-----------------------|-----------------------|---------|-----------|----------|
| RM2     | necrosis | 9.99                   | 1.03                 | 6.90                  | 13.31                 | 2.19    | 2.38      | 3.17     |
|         | CL       | 4.20                   | 0.85                 | 1.93                  | 6.09                  |         |           |          |
| RM3     | necrosis | 11.23                  | 0.92                 | 8.55                  | 13.09                 | 1.96    | 2.12      | 2.47     |
|         | CL       | 5.30                   | 0.45                 | 4.29                  | 6.69                  |         |           |          |
| RM4     | necrosis | 5.93                   | 0.88                 | 3.55                  | 8.61                  | 2.22    | 2.89      | 4.20     |
|         | CL       | 2.05                   | 0.68                 | 0.93                  | 3.88                  |         |           |          |

Complete data on PET VOIs for mice with experimental radiation necrosis injected with [<sup>18</sup>F]PARPi.

| Subject | Region   | %ID/cc <sub>mean</sub> | %ID/cc <sub>SD</sub> | %ID/cc <sub>min</sub> | %ID/cc <sub>max</sub> | max/max | mean/mean | max/mean |
|---------|----------|------------------------|----------------------|-----------------------|-----------------------|---------|-----------|----------|
| RM10    | necrosis | 0.27                   | 0.18                 | 0.00                  | 1.41                  | 1.07    | 1.60      | 8.33     |
|         | CL       | 0.17                   | 0.12                 | 0.00                  | 1.31                  |         |           |          |
| RM3     | necrosis | 0.22                   | 0.16                 | 0.00                  | 1.32                  | 0.76    | 1.45      | 8.56     |
|         | CL       | 0.15                   | 0.13                 | 0.00                  | 1.74                  |         |           |          |
| RM4     | necrosis | 0.19                   | 0.15                 | 0.00                  | 1.22                  | 1.22    | 1.38      | 8.97     |
|         | CL       | 0.14                   | 0.11                 | 0.00                  | 1.00                  |         |           |          |

CL = contralateral.

**Table S3.** Complete data on PET VOIs for U251 tumor-bearing mice injected with [<sup>18</sup>F]FET.

| Subject | Region | %ID/cc <sub>mean</sub> | %ID/cc <sub>SD</sub> | %ID/cc <sub>min</sub> | %ID/cc <sub>max</sub> | max/max | mean/mean | max/mean | CEA (mm <sup>3</sup> ) |
|---------|--------|------------------------|----------------------|-----------------------|-----------------------|---------|-----------|----------|------------------------|
| TM1*    | tumor  | 2.70                   | 0.48                 | 1.08                  | 5.32                  | 1.10    | 0.97      | 1.90     | 0                      |
|         | CL     | 2.79                   | 0.51                 | 1.13                  | 4.82                  |         |           |          |                        |
| TM2     | tumor  | 1.73                   | 0.54                 | 0.27                  | 4.64                  | 1.17    | 1.08      | 2.90     | 7.3                    |
|         | CL     | 1.60                   | 0.37                 | 0.47                  | 3.96                  |         |           |          |                        |
| TM3*    | tumor  | 1.76                   | 0.43                 | 0.50                  | 4.56                  | 1.24    | 0.98      | 2.54     | 0                      |
|         | CL     | 1.80                   | 0.43                 | 0.75                  | 3.69                  |         |           |          |                        |
| TM4*    | tumor  | 1.81                   | 0.45                 | 0.74                  | 4.82                  | 1.11    | 0.95      | 2.52     | 1.2                    |
|         | CL     | 1.91                   | 0.42                 | 0.72                  | 4.34                  |         |           |          |                        |
| TM5     | tumor  | 1.96                   | 0.55                 | 0.69                  | 4.76                  | 1.23    | 1.07      | 2.60     | 6.4                    |
|         | CL     | 1.83                   | 0.44                 | 0.67                  | 3.87                  |         |           |          |                        |
| TM6     | tumor  | 2.02                   | 0.46                 | 0.81                  | 3.86                  | 0.94    | 1.05      | 2.01     | 6.6                    |
|         | CL     | 1.92                   | 0.42                 | 0.43                  | 4.11                  |         |           |          |                        |
| TM7     | tumor  | 3.85                   | 1.96                 | 1.31                  | 11.24                 | 1.92    | 1.51      | 4.42     | 15.9                   |
|         | CL     | 2.55                   | 0.57                 | 0.57                  | 5.87                  |         |           |          |                        |
| TM8     | tumor  | 2.46                   | 0.54                 | 0.76                  | 5.51                  | 1.28    | 1.10      | 2.46     | 8.5                    |
|         | CL     | 2.25                   | 0.50                 | 0.55                  | 4.30                  |         |           |          |                        |
| TM9     | tumor  | 4.44                   | 2.53                 | 1.08                  | 15.16                 | 2.00    | 1.71      | 5.83     | 23.8                   |
|         | CL     | 2.60                   | 0.64                 | 0.46                  | 7.59                  |         |           |          |                        |

CL = contralateral; CEA = contrast enhancing area (based on single-frame postcontrast MRI analysis).

\*mouse was excluded from statistical analysis of PET data based on CEA < 1.5 mm<sup>3</sup>.

**Table S4.** Complete data on PET VOIs for U251 tumor-bearing mice injected with [<sup>18</sup>F]PARPi.

| Subject | Region | %ID/cc <sub>mean</sub> | %ID/cc <sub>SD</sub> | %ID/cc <sub>min</sub> | %ID/cc <sub>max</sub> | max/max | mean/mean | max/mean | CEA (mm <sup>3</sup> ) |
|---------|--------|------------------------|----------------------|-----------------------|-----------------------|---------|-----------|----------|------------------------|
| TM1*    | tumor  | 0.11                   | 0.07                 | 0.00                  | 0.66                  | 0.97    | 0.68      | 4.04     | 0                      |
|         | CL     | 0.16                   | 0.09                 | 0.00                  | 0.68                  |         |           |          |                        |
| TM2     | tumor  | 0.14                   | 0.11                 | 0.00                  | 0.84                  | 1.59    | 1.41      | 8.24     | 7.3                    |
|         | CL     | 0.10                   | 0.07                 | 0.00                  | 0.53                  |         |           |          |                        |
| TM3*    | tumor  | 0.11                   | 0.10                 | 0.00                  | 0.85                  | 1.17    | 0.81      | 6.04     | 0                      |
|         | CL     | 0.14                   | 0.09                 | 0.00                  | 0.72                  |         |           |          |                        |
| TM4*    | tumor  | 0.15                   | 0.11                 | 0.01                  | 0.74                  | 0.99    | 1.13      | 5.47     | 1.2                    |
|         | CL     | 0.14                   | 0.09                 | 0.00                  | 0.74                  |         |           |          |                        |
| TM5     | tumor  | 0.18                   | 0.18                 | 0.00                  | 1.36                  | 1.63    | 1.22      | 9.05     | 6.4                    |
|         | CL     | 0.15                   | 0.10                 | 0.00                  | 0.83                  |         |           |          |                        |
| TM6     | tumor  | 0.14                   | 0.10                 | 0.00                  | 0.87                  | 1.08    | 1.08      | 6.50     | 6.6                    |
|         | CL     | 0.13                   | 0.09                 | 0.00                  | 0.80                  |         |           |          |                        |
| TM7     | tumor  | 0.50                   | 0.56                 | 0.00                  | 2.82                  | 2.66    | 3.34      | 18.86    | 15.9                   |
|         | CL     | 0.15                   | 0.13                 | 0.00                  | 1.06                  |         |           |          |                        |
| TM8     | tumor  | 0.12                   | 0.11                 | 0.00                  | 0.85                  | 1.36    | 1.24      | 8.78     | 8.5                    |
|         | CL     | 0.10                   | 0.08                 | 0.00                  | 0.63                  |         |           |          |                        |
| TM9     | tumor  | 0.83                   | 0.85                 | 0.00                  | 5.35                  | 3.08    | 4.41      | 28.41    | 23.8                   |
|         | CL     | 0.19                   | 0.18                 | 0.00                  | 1.73                  |         |           |          |                        |
| TM10    | tumor  | 0.30                   | 0.37                 | 0.00                  | 2.36                  | 2.19    | 1.97      | 15.54    | 8.10                   |
|         | CL     | 0.15                   | 0.12                 | 0.00                  | 1.07                  |         |           |          |                        |

CL = contralateral; CEA = contrast enhancing area (based on single-frame postcontrast MRI analysis).

\*mouse was excluded from statistical analysis of PET data based on CEA < 1.5 mm<sup>3</sup>.

**Table S5.** Complete data on PET VOIs for treatment naïve mice injected with [<sup>18</sup>F]FET.

| Subject | Region | %ID/cc <sub>mean</sub> | %ID/cc <sub>SD</sub> | %ID/cc <sub>min</sub> | %ID/cc <sub>max</sub> | max/max | mean/mean | max/mean |
|---------|--------|------------------------|----------------------|-----------------------|-----------------------|---------|-----------|----------|
| H5      | right  | 0.98                   | 0.58                 | 0.02                  | 6.43                  | 1.22    | 1.06      | 6.99     |
|         | left   | 0.92                   | 0.52                 | 0.02                  | 5.28                  |         |           |          |
| H6      | right  | 3.73                   | 1.43                 | 0.40                  | 12.22                 | 0.98    | 1.02      | 3.34     |
|         | left   | 3.66                   | 1.36                 | 0.64                  | 12.42                 |         |           |          |
| H7      | right  | 3.11                   | 1.05                 | 0.22                  | 8.76                  | 0.81    | 0.99      | 2.80     |
|         | left   | 3.12                   | 1.01                 | 0.31                  | 10.86                 |         |           |          |
| H8      | right  | 2.27                   | 1.09                 | 0.05                  | 9.12                  | 1.15    | 0.90      | 3.62     |
|         | left   | 2.52                   | 1.07                 | 0.17                  | 7.93                  |         |           |          |

Complete data on PET VOIs for treatment naïve mice injected with [<sup>18</sup>F]PARPi.

| Subject | Region | %ID/cc <sub>mean</sub> | %ID/cc <sub>SD</sub> | %ID/cc <sub>min</sub> | %ID/cc <sub>max</sub> | max/max | mean/mean | max/mean |
|---------|--------|------------------------|----------------------|-----------------------|-----------------------|---------|-----------|----------|
| H1      | right  | 0.21                   | 0.13                 | 0.01                  | 1.04                  | 1.02    | 1.04      | 5.11     |
|         | left   | 0.20                   | 0.12                 | 0.01                  | 1.01                  |         |           |          |
| H2      | right  | 0.18                   | 0.10                 | 0.01                  | 0.81                  | 1.02    | 1.12      | 4.91     |
|         | left   | 0.16                   | 0.09                 | 0.01                  | 0.79                  |         |           |          |
| H3      | right  | 0.17                   | 0.11                 | 0.00                  | 1.10                  | 1.05    | 1.09      | 6.85     |
|         | left   | 0.16                   | 0.12                 | 0.00                  | 1.04                  |         |           |          |
| H4      | right  | 0.20                   | 0.11                 | 0.00                  | 0.90                  | 1.02    | 1.22      | 5.38     |
|         | left   | 0.17                   | 0.11                 | 0.00                  | 0.88                  |         |           |          |

CL = contralateral.

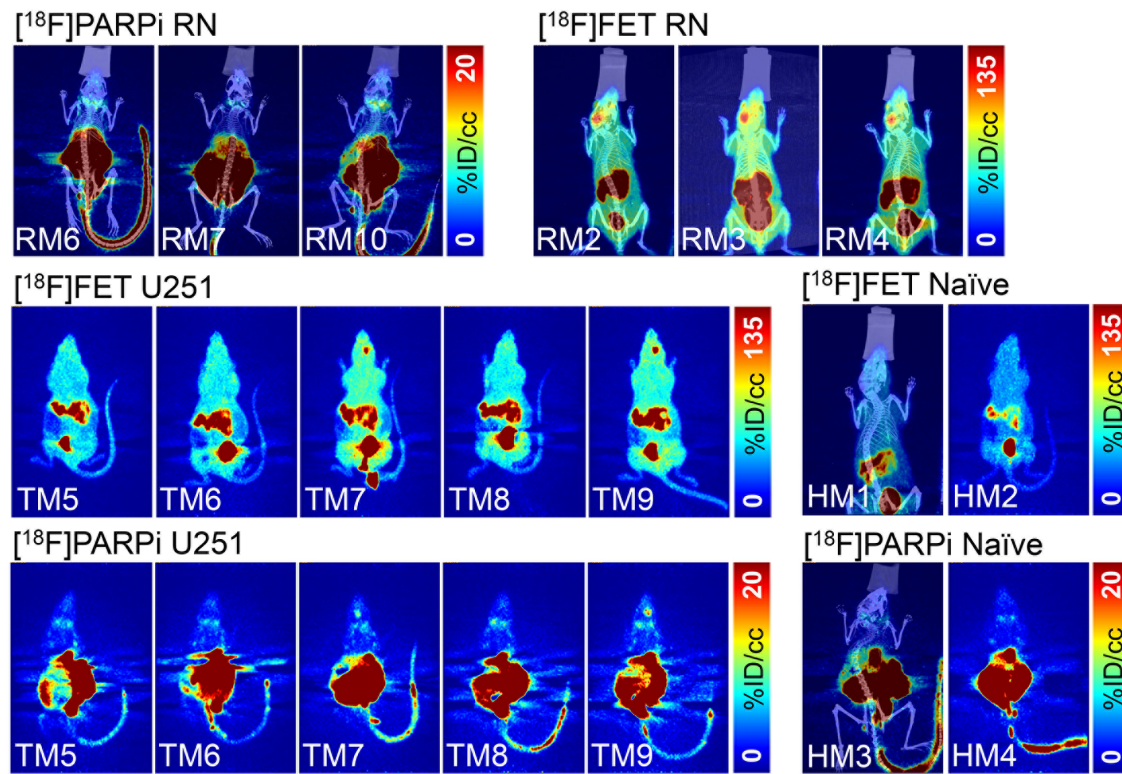

**Fig. S5** PET and PET/CT maximum intensity projections.

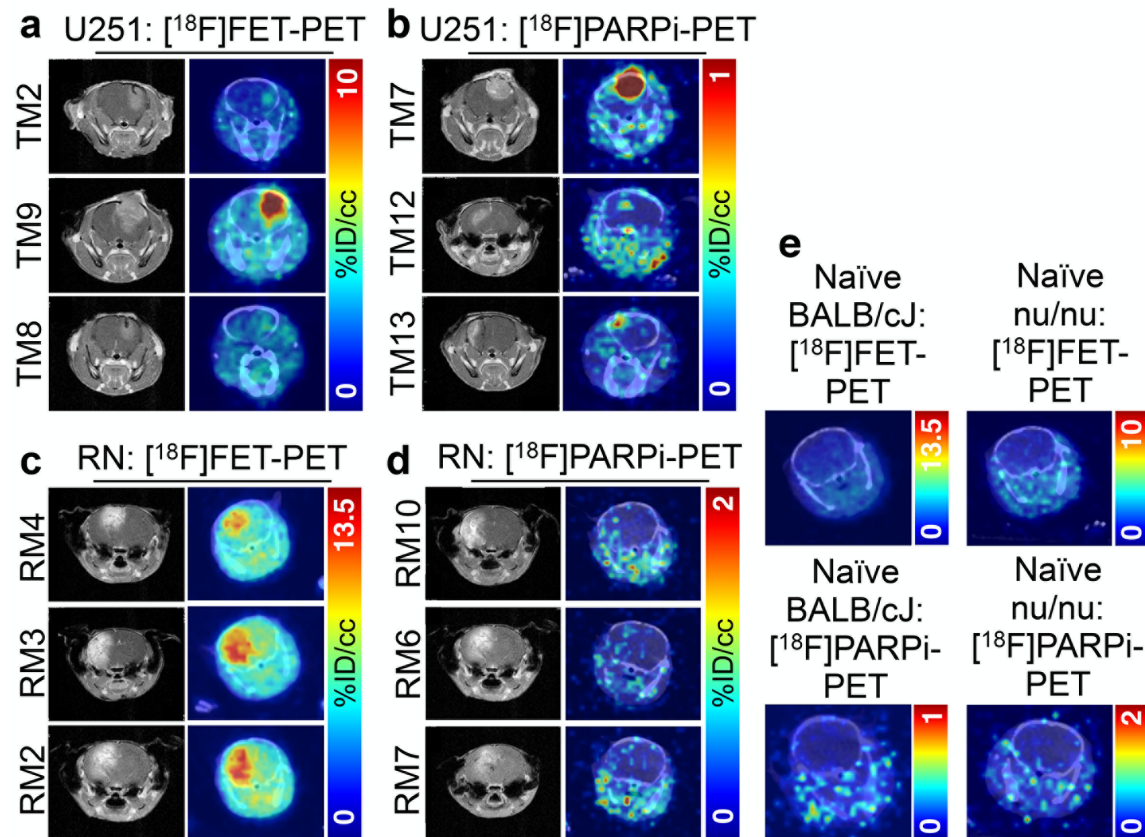

**Fig. S6** Additional DCE-MR and PET/CT images. (a) DCE-MR and fused PET/CT transaxial slices for U251 tumor-bearing mice injected with [ $^{18}\text{F}$ ]FET; (b) DCE-MR and fused PET/CT transaxial slices for U251 tumor-bearing mice injected with [ $^{18}\text{F}$ ]PARPi; (c) DCE-MR and fused PET/CT transaxial slices for irradiated mice injected with [ $^{18}\text{F}$ ]FET; (d) DCE-MR and fused PET/CT transaxial slices for irradiated mice injected with [ $^{18}\text{F}$ ]PARPi; (e) fused PET/CT transaxial slices for treatment naïve mice injected with [ $^{18}\text{F}$ ]FET (top row) and [ $^{18}\text{F}$ ]PARPi (bottom row).

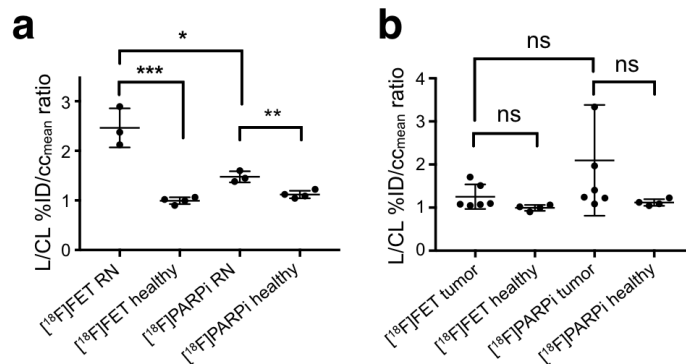

**Fig. S7** Quantification of mean uptake ratios for PET VOIs. (a) Lesioned-to-contralateral hemisphere  $\%ID/cc_{\text{mean}}$  ratios for mice in radiation necrosis and healthy groups. (b) Lesioned-to-contralateral hemisphere  $\%ID/cc_{\text{mean}}$  ratios for mice in tumor and healthy groups. One data point is outside the axis limits. \*significant at  $p < 0.05$ ; \*\*significant at  $p < 0.005$ ; \*\*\*significant at  $p < 0.001$ ; all unpaired t-tests except for within tumor group which used a paired t-test.

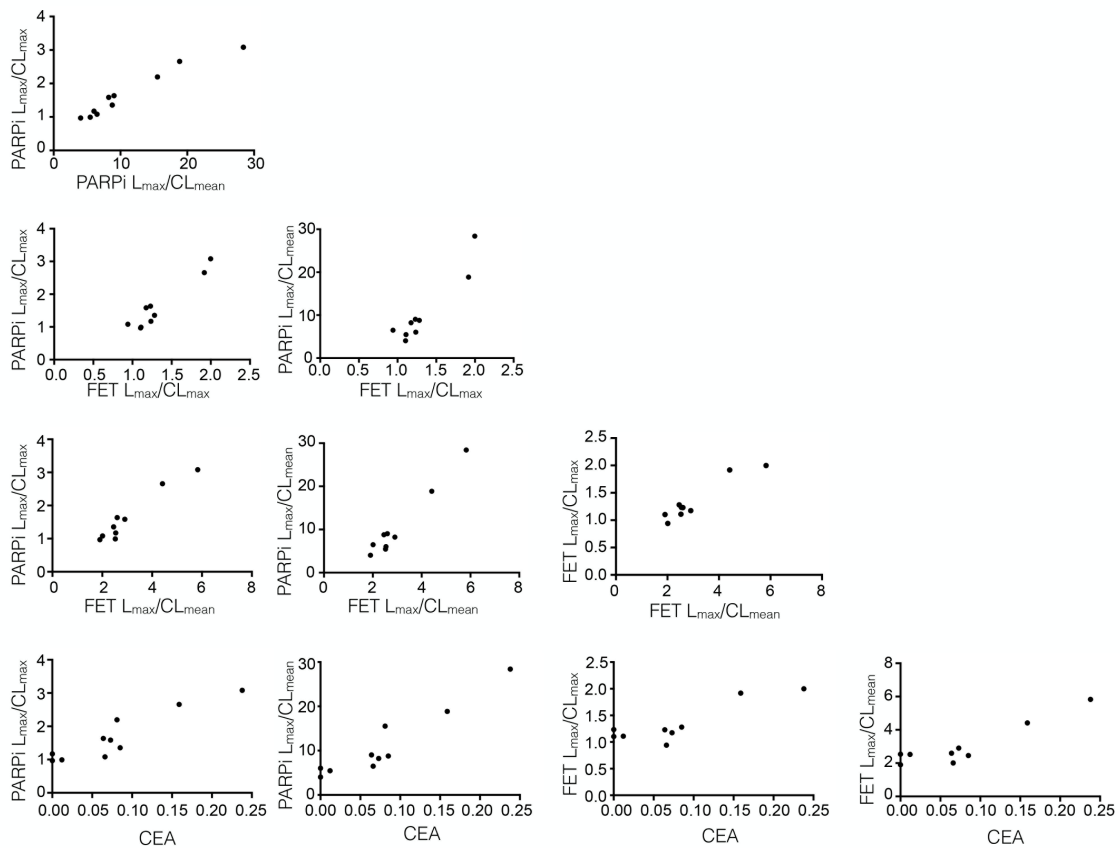

**Fig. S8** Correlation of contrast-enhancing area (CEA) on DCE-MR to PARPi-PET and FET-PET  $L_{max}/CL_{max}$  and  $L_{max}/CL_{mean}$  %ID/cc ratios.



**Table S6** Matrix of Pearson's r and p-values for correlation of contrast-enhancing area on DCE-MR to PET  $L_{\max}/CL_{\max}$  and  $L_{\max}/CL_{\text{mean}}$  uptake ratios.

|                                      | PARPi<br>$L_{\max}/CL_{\max}$ | PARPi<br>$L_{\max}/CL_{\text{mean}}$ | FET<br>$L_{\max}/CL_{\max}$ | FET<br>$L_{\max}/CL_{\text{mean}}$ | CEA                   |
|--------------------------------------|-------------------------------|--------------------------------------|-----------------------------|------------------------------------|-----------------------|
| PARPi<br>$L_{\max}/CL_{\max}$        |                               | 0.98                                 | 0.96                        | 0.97                               | 0.92                  |
| PARPi<br>$L_{\max}/CL_{\text{mean}}$ | 0.98                          |                                      | 0.94                        | 0.98                               | 0.95                  |
| FET<br>$L_{\max}/CL_{\max}$          | 0.96                          | 0.94                                 |                             | 0.95                               | 0.87                  |
| FET<br>$L_{\max}/CL_{\text{mean}}$   | 0.97                          | 0.98                                 | 0.95                        |                                    | 0.92                  |
| CEA                                  | 0.92                          | 0.95                                 | 0.87                        | 0.92                               |                       |
|                                      | PARPi<br>$L_{\max}/CL_{\max}$ | PARPi<br>$L_{\max}/CL_{\text{mean}}$ | FET<br>$L_{\max}/CL_{\max}$ | FET<br>$L_{\max}/CL_{\text{mean}}$ | CEA                   |
| PARPi<br>$L_{\max}/CL_{\max}$        |                               | $1.61 \times 10^{-6}$                | $5.02 \times 10^{-5}$       | $2.03 \times 10^{-5}$              | $1.54 \times 10^{-4}$ |
| PARPi<br>$L_{\max}/CL_{\text{mean}}$ | $1.61 \times 10^{-6}$         |                                      | $1.64 \times 10^{-4}$       | $2.68 \times 10^{-6}$              | $3.29 \times 10^{-5}$ |
| FET<br>$L_{\max}/CL_{\max}$          | $5.02 \times 10^{-5}$         | $1.64 \times 10^{-4}$                |                             | $8.80 \times 10^{-5}$              | $2.42 \times 10^{-3}$ |
| FET<br>$L_{\max}/CL_{\text{mean}}$   | $2.03 \times 10^{-5}$         | $2.68 \times 10^{-6}$                | $8.80 \times 10^{-5}$       |                                    | $5.16 \times 10^{-4}$ |
| CEA                                  | $1.54 \times 10^{-4}$         | $3.29 \times 10^{-5}$                | $2.42 \times 10^{-3}$       | $5.16 \times 10^{-4}$              |                       |

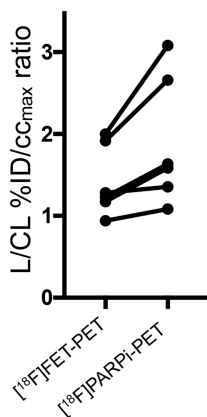

**Fig. S9** Tumor/contralateral  $\%ID/cc_{\max}$  ratios for U251 tumor-bearing mice imaged on successive days with both  $[^{18}\text{F}]\text{PARPi}$  and  $[^{18}\text{F}]\text{FET}$ . Connecting lines are drawn to indicate paired relationships.
